# Supplementary material for: Quantitation of faecal Fusobacterium improves faecal immunochemical test in detecting advanced colorectal neoplasia
Source: PubMed Central journal article supplement — Gut. 2016 Dec 24;66(8):1441–8. doi: 10.1136/gutjnl-2016-312766 (PMC5530471; doi:10.1136/gutjnl-2016-312766), 2016-12-24
Supplement: gutjnl-2016-312766supp001.pdf [file gutjnl-2016-312766supp001.pdf]

**This supplementary file contains eight supplementary figures, four supplementary tables and one supplementary appendix.**

Manuscript entitled **“Quantitation of Fecal *Fusobacterium* Improves Performance of Fecal Immunochemical Test in Detecting Advanced Colorectal Neoplasia”**

Wong and Kwong et al.

**Supplementary Figure 1.** Correlation between first and second detection Ct values of total bacteria for the same stool samples.

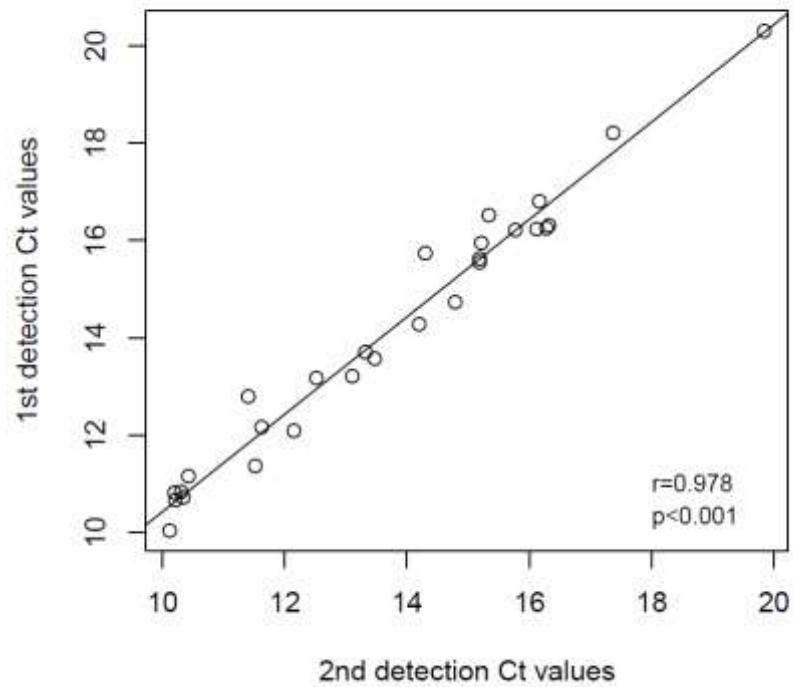

**Supplementary Figure 2.** Quantitative PCR melt curves of the microbial marker *Fn* (A), *Pa* (B) and *Pm* (C), respectively.

**A**

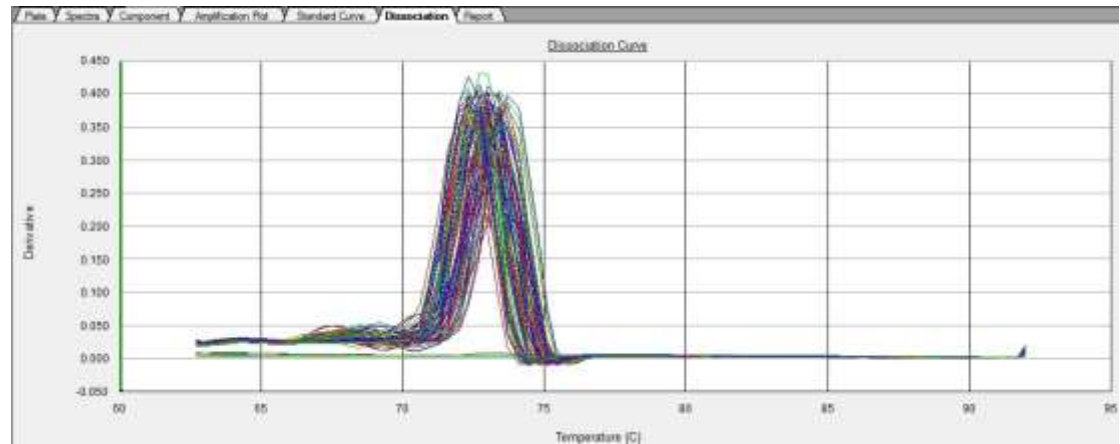

**B**

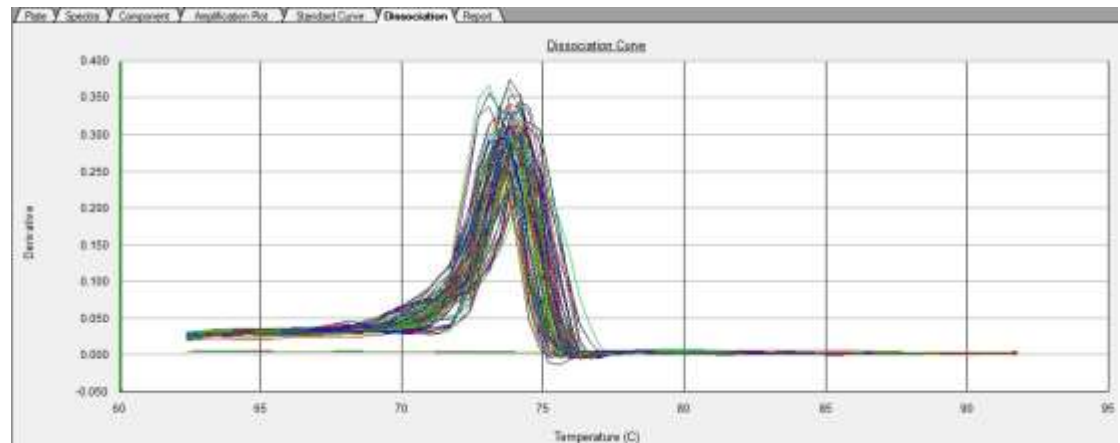

**C**

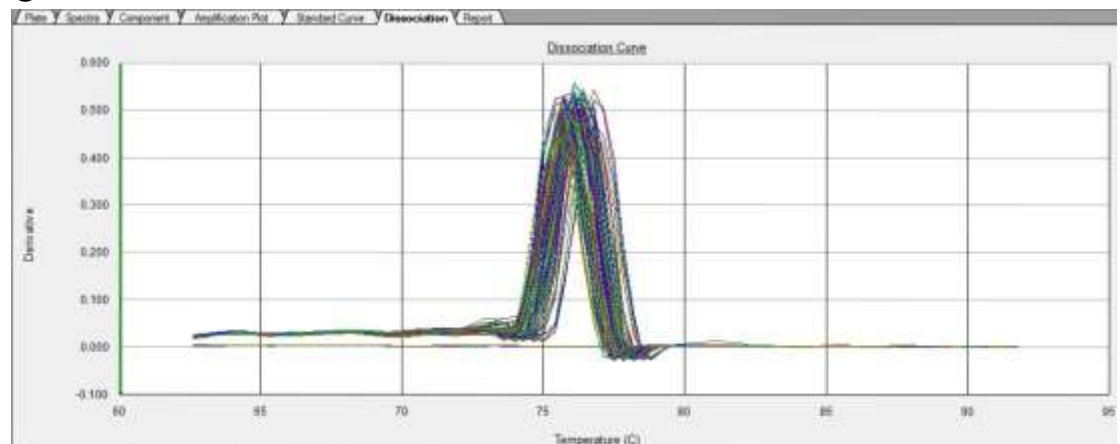

**Supplementary Figure 3.** Relative abundance of the microbial marker *Fn* (A), *Pa* (B) and *Pm* (C) in CRC, advanced adenoma (AA) and control samples. The Mann-Whitney U two-tailed test was used for comparisons. \*\*\* $p < 0.001$ , \*\* $p < 0.01$ , \* $p < 0.05$

**A**

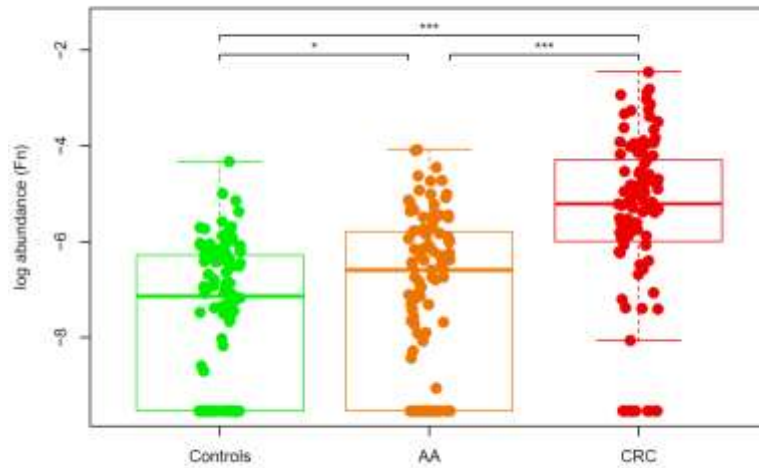

**B**

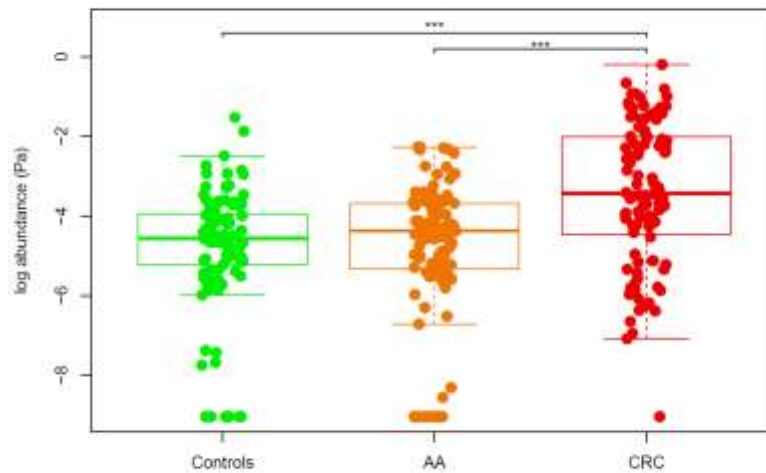

**C**

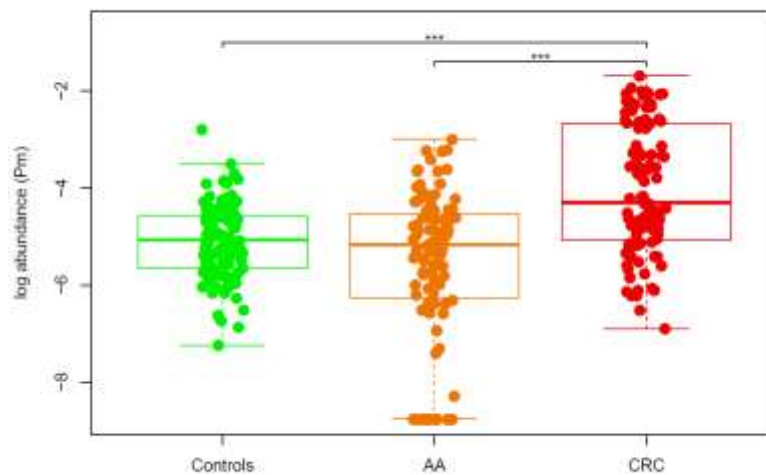

**Supplementary Figure 4.** Diagnostic performance with the AUC, sensitivities and specificities of FIT, individual microbial markers and their combinations for the diagnosis of CRC (A) or advanced adenoma (AA) (B).

**A**

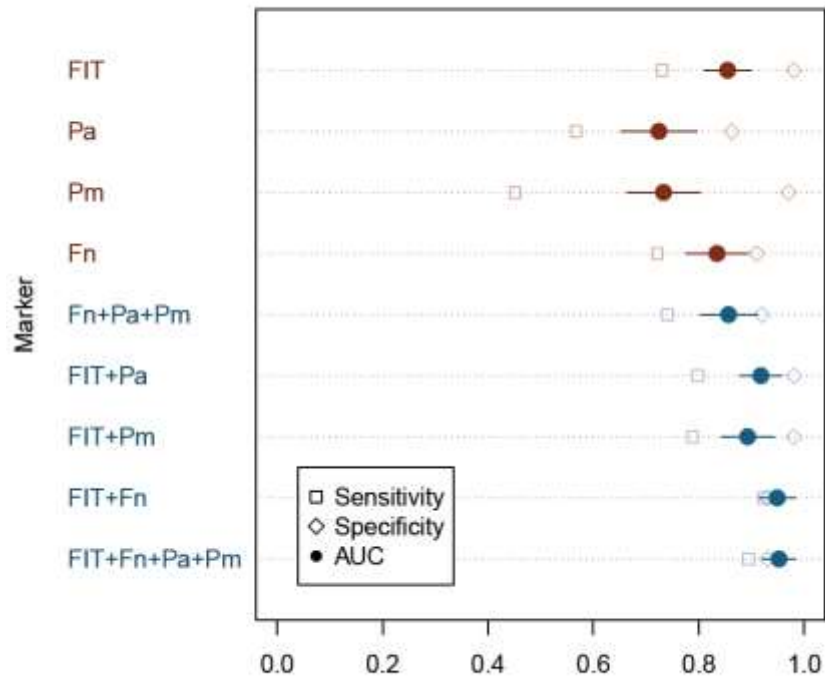

**B**

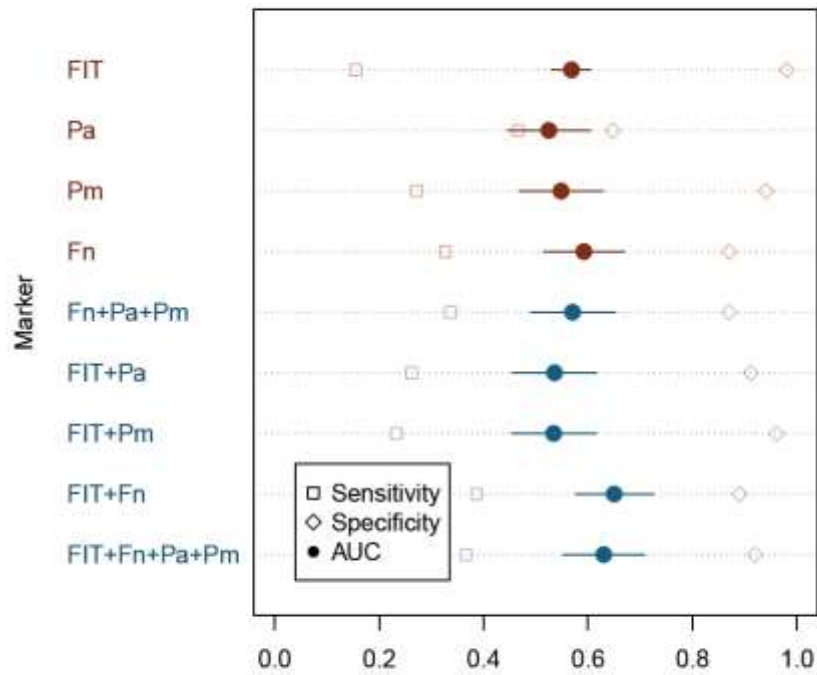

**Supplementary Figure 5.** ROC analysis of individual microbial markers for the diagnosis of CRC.

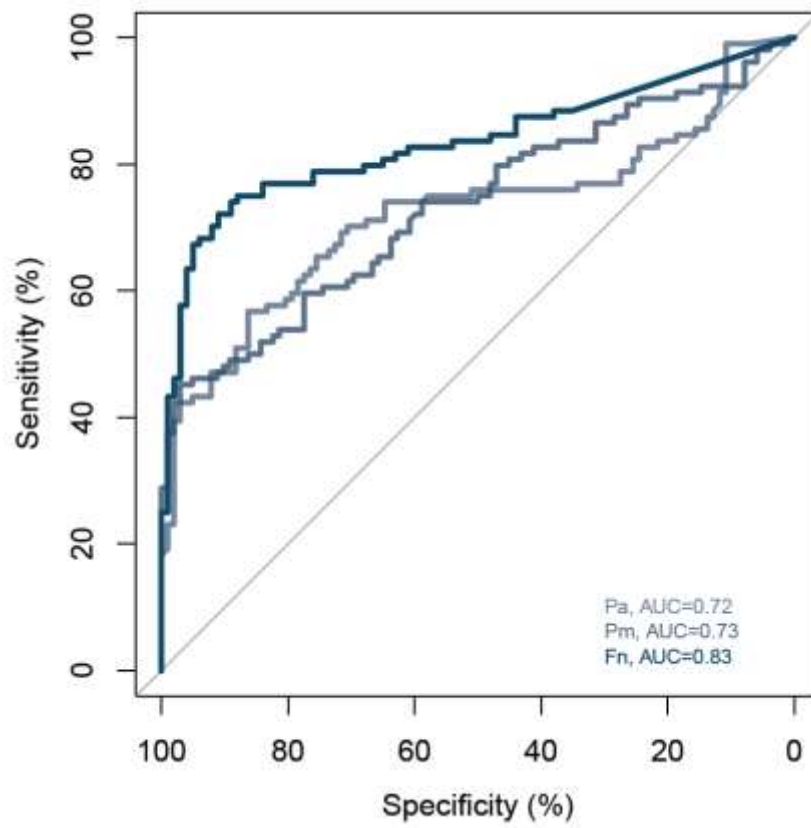

**Supplementary Figure 6.** The ROC analysis of FIT, marker *Fh* and their combined test for diagnosing advanced adenoma in the discovery (A) and validation (B) cohorts.

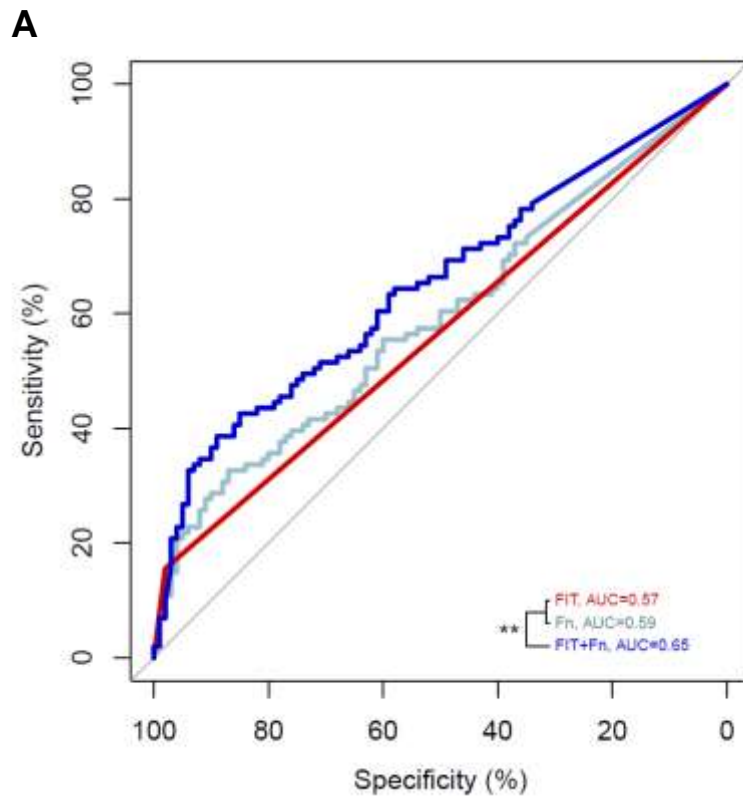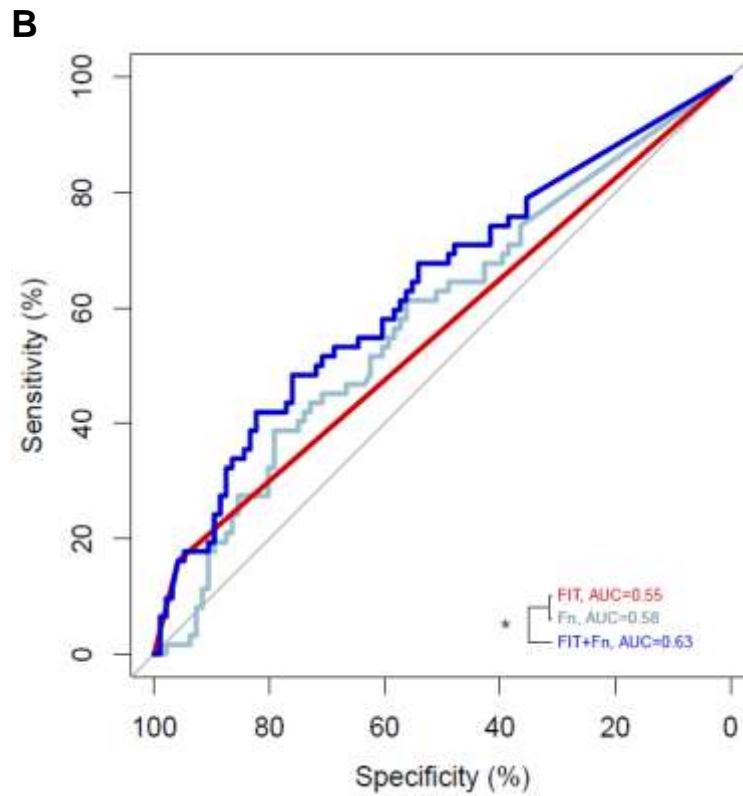

**Supplementary Figure 7.** The advanced adenoma samples detected by FIT (red), missed by FIT and detected by marker *Fn* (blue), and missed by both test (yellow). The dotted lines indicate the threshold of the individual test above which samples are regarded as positive.

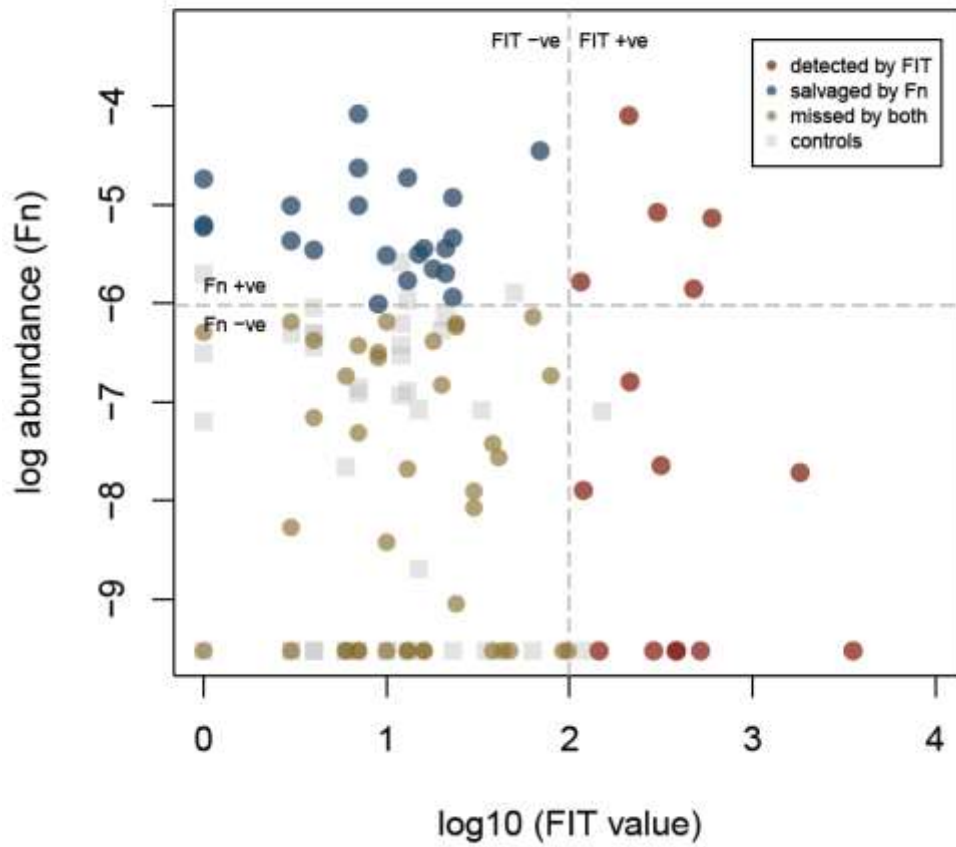



**Supplementary Figure 8.** Relative abundance of the microbial marker *Fn* in the validation (A) and combined (B) cohorts. The Mann–Whitney U one-tailed test was used for two-group comparisons for the validation cohort. \*\*\* $p < 0.001$ , \*\* $p < 0.01$ , \* $p < 0.05$

**A**

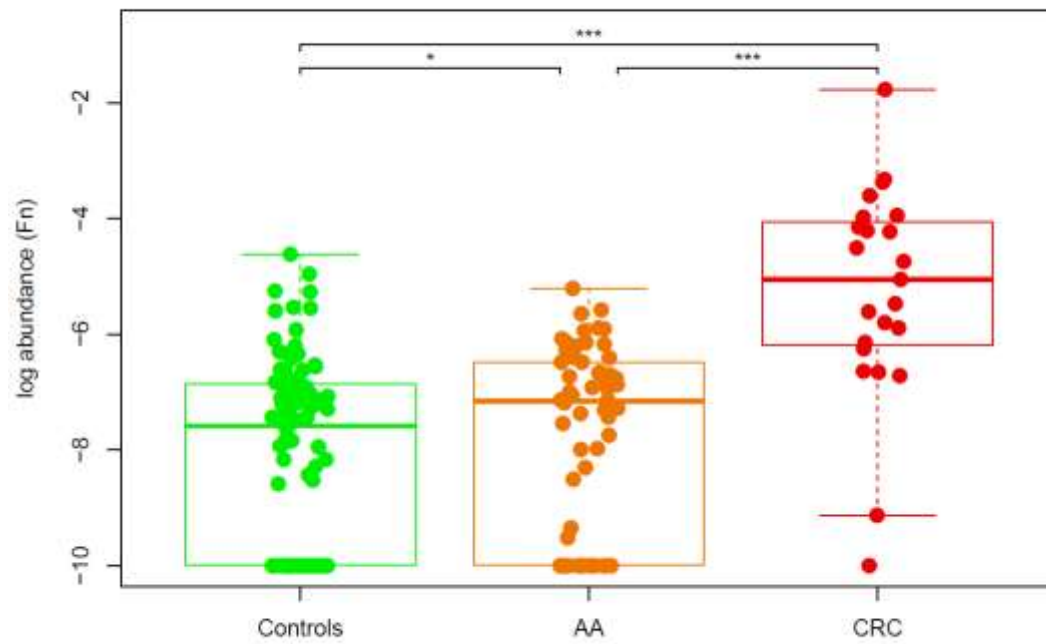

**B**

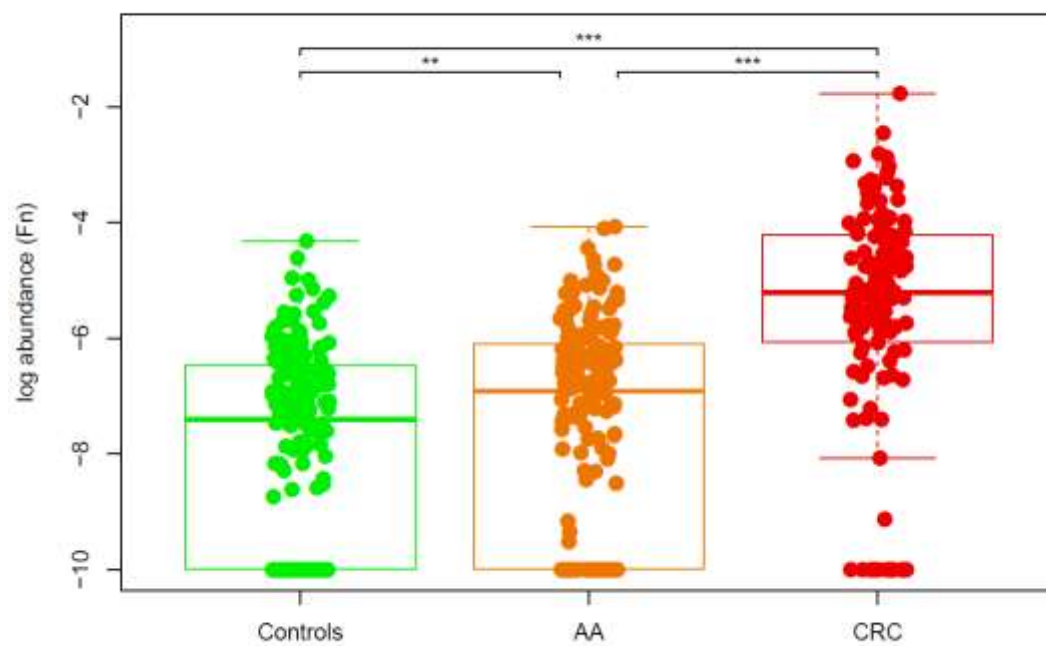

**Supplementary Table 1.** Background demographic of the study cohorts and location of the most advanced neoplasm.

| <b><u>Parameter</u></b>       | <b><u>Discovery Cohort</u></b> |                  |                        | <b><u>Validation Cohort</u></b> |                  |                        | <b><u>Overall</u></b> |
|-------------------------------|--------------------------------|------------------|------------------------|---------------------------------|------------------|------------------------|-----------------------|
|                               | <b><u>CRC</u></b>              | <b><u>AA</u></b> | <b><u>Controls</u></b> | <b><u>CRC</u></b>               | <b><u>AA</u></b> | <b><u>Controls</u></b> |                       |
| <i>N</i>                      | 104                            | 103              | 102                    | 23                              | 62               | 96                     | 490                   |
| <b><u>Age</u></b>             |                                |                  |                        |                                 |                  |                        |                       |
| Mean ± SD                     | 66.9 ± 10.1                    | 61.3 ± 6.6       | 57.1 ± 5.8             | 63.8 ± 12.3                     | 58.1 ± 5.4       | 58.6 ± 7.7             | 60.4 ± 8.2            |
| Range                         | 44 – 90                        | 49 – 80          | 39 – 70                | 51 – 78                         | 46 – 67          | 38 – 89                | 38 – 90               |
| <b><u>Gender</u></b>          |                                |                  |                        |                                 |                  |                        |                       |
| Male                          | 65 (62.5%)                     | 66 (64.1%)       | 69 (67.7%)             | 14 (60.9%)                      | 43 (75.8%)       | 53 (55.2%)             | 310 (63.3%)           |
| Female                        | 39 (37.5%)                     | 37 (35.9%)       | 33 (32.3%)             | 9 (39.1%)                       | 19 (24.2%)       | 43 (44.8%)             | 180 (36.7%)           |
| <b><u>Tumour location</u></b> |                                |                  |                        |                                 |                  |                        |                       |
| Proximal                      | 28 (26.9%)                     | 43 (41.7%)       | NA                     | 7 (30.4%)                       | 24 (38.7%)       | NA                     | NA                    |
| Distal                        | 76 (73.1%)                     | 60 (58.3%)       |                        | 16 (69.6%)                      | 38 (61.3%)       |                        |                       |

**Supplementary Table 2.** Test performance of FIT, the microbial markers and their combination for CRC. The AUC of the markers were compared with FIT. Two-sided Delong's test was used for microbial markers, whereas one-sided Delong's test was used for the combinational markers to test for incremental gain in AUC.

| <u>Marker</u>        | <u>Threshold</u>     | <u>Sensitivity</u> | <u>Specificity</u> | <u>AUC</u>       | <u>Compare with FIT</u> |
|----------------------|----------------------|--------------------|--------------------|------------------|-------------------------|
| <i>CRC model</i>     |                      |                    |                    |                  |                         |
| FIT                  | 100 ng/mL            | 73.1% (64.4-81.8%) | 98.0% (95.1-100%)  | 0.86 (0.81-0.90) | Reference               |
| <i>Fn</i>            | $1.5 \times 10^{-6}$ | 72.1% (62.5-80.8%) | 91.0% (85.0-96.0%) | 0.83 (0.78-0.89) | Not significant         |
| <i>Pa</i>            | $2.7 \times 10^{-4}$ | 56.7% (47.1-66.4%) | 86.3% (79.4-93.1%) | 0.72 (0.65-0.80) | Not significant         |
| <i>Pm</i>            | $1.6 \times 10^{-4}$ | 45.2% (35.6-54.8%) | 97.1% (93.1-100%)  | 0.73 (0.66-0.80) | Not significant         |
| FIT+ <i>Fn</i>       | 0.166                | 92.3% (86.5-97.1%) | 93.0% (88.0-97.0%) | 0.95 (0.92-0.98) | $p < 0.001$             |
| FIT+ <i>Pa</i>       | 0.762                | 79.8% (71.1-87.5%) | 98.0% (95.1-100%)  | 0.92 (0.88-0.96) | $p < 0.001$             |
| FIT+ <i>Pm</i>       | 0.798                | 78.9% (71.1-86.5%) | 98.0% (95.1-100%)  | 0.89 (0.84-0.94) | $p = 0.026$             |
| FIT+ <i>Fn+Pa+Pm</i> | 0.218                | 89.4% (83.7-95.2%) | 93.0% (87.0-97.0%) | 0.95 (0.92-0.98) | $p < 0.001$             |

**Supplementary Table 3.** Test performance of FIT, the microbial markers and their combination for advanced adenoma (AA). The AUC of the markers were compared with FIT. Two-sided Delong's test was used for microbial markers, whereas one-sided Delong's test was used for the combinational markers to test for incremental gain in AUC.

| <u>Marker</u>        | <u>Threshold</u>     | <u>Sensitivity</u> | <u>Specificity</u> | <u>AUC</u>       | <u>Compare with FIT</u> |
|----------------------|----------------------|--------------------|--------------------|------------------|-------------------------|
| <i>AA model</i>      |                      |                    |                    |                  |                         |
| FIT                  | 100 ng/mL            | 15.5% (8.7-22.3%)  | 98.0% (95.1-100%)  | 0.57 (0.53-0.61) | Reference               |
| <i>Fn</i>            | $9.6 \times 10^{-7}$ | 32.7% (23.8-41.6%) | 87.0% (80.0-93.0%) | 0.59 (0.51-0.67) | Not significant         |
| <i>Pa</i>            | $5.5 \times 10^{-5}$ | 46.6% (36.9-55.3%) | 64.7% (55.9-73.5%) | 0.52 (0.44-0.60) | Not significant         |
| <i>Pm</i>            | $6.9 \times 10^{-7}$ | 27.2% (19.4-36.0%) | 94.1% (89.2-98.0%) | 0.55 (0.47-0.63) | Not significant         |
| FIT+ <i>Fn</i>       | 0.464                | 38.6% (28.7-48.5%) | 89.0% (83.0-95.0%) | 0.65 (0.58-0.73) | $p=0.007$               |
| FIT+ <i>Pa</i>       | 0.468                | 26.2% (18.5-35.0%) | 91.2% (85.3-96.1%) | 0.54 (0.46-0.62) | Not significant         |
| FIT+ <i>Pm</i>       | 0.496                | 23.3% (15.5-32.0%) | 96.1% (92.2-99.0%) | 0.54 (0.45-0.62) | Not significant         |
| FIT+ <i>Fn+Pa+Pm</i> | 0.479                | 36.6% (27.7-45.5%) | 92.0% (86.0-97.0%) | 0.63 (0.55-0.71) | $p=0.034$               |

**Supplementary Table 4.** Test performance of FIT, marker *Fn* and both markers for CRC and advanced adenoma (AA) in the validation and combined cohorts, fitting the model from the discovery cohort. The AUC of the markers were compared with FIT. Two-sided Delong's test was used for microbial markers, whereas one-sided Delong's test was used for the combinational markers to test for incremental gain in AUC.

| <u>Marker</u>    | <u>Cohort</u> | <u>Threshold</u>       | <u>Sensitivity</u> | <u>Specificity</u> | <u>AUC</u>       | <u>Compare with FIT</u> |
|------------------|---------------|------------------------|--------------------|--------------------|------------------|-------------------------|
| <i>CRC model</i> |               |                        |                    |                    |                  |                         |
| FIT              | Validation    | 100 ng/mL              | 73.9% (56.5-91.3%) | 95.8% (91.7-99.0%) | 0.85 (0.76-0.94) | Reference               |
| <i>Fn</i>        | Validation    | 1.2 x 10 <sup>-6</sup> | 91.3% (78.3-100%)  | 80.2% (71.9-87.5%) | 0.89 (0.80-0.98) | Not significant         |
| FIT+ <i>Fn</i>   | Validation    | 0.281                  | 82.6% (65.2-95.7%) | 94.8% (90.6-99.0%) | 0.96 (0.92-0.99) | <i>p</i> =0.0014        |
| FIT              | All           | 100 ng/mL              | 73.2% (65.4-81.1%) | 96.9% (94.4-99.0%) | 0.85 (0.81-0.89) | Reference               |
| <i>Fn</i>        | All           | 1.5 x 10 <sup>-7</sup> | 73.2% (65.4-80.3%) | 90.8% (86.7-94.4%) | 0.85 (0.80-0.90) | Not significant         |
| FIT+ <i>Fn</i>   | All           | 0.235                  | 88.2% (81.9-93.7%) | 94.4% (90.8-97.5%) | 0.95 (0.92-0.98) | <i>p</i> <0.001         |
| <i>AA model</i>  |               |                        |                    |                    |                  |                         |
| FIT              | Validation    | 100 ng/mL              | 16.1% (8.1-25.8%)  | 95.8% (91.7-99.0%) | 0.56 (0.51-0.61) | Reference               |
| <i>Fn</i>        | Validation    | 9.4 x 10 <sup>-7</sup> | 38.7% (25.8-51.6%) | 79.2% (70.8-87.5%) | 0.58 (0.49-0.67) | Not significant         |
| FIT+ <i>Fn</i>   | Validation    | 0.445                  | 48.4% (35.5-61.3%) | 76.0% (67.7-84.4%) | 0.63 (0.55-0.72) | <i>p</i> =0.031         |
| FIT              | All           | 100 ng/mL              | 15.3% (10.4-20.9%) | 96.9% (94.4-99.0%) | 0.56 (0.53-0.59) | Reference               |
| <i>Fn</i>        | All           | 9.4 x 10 <sup>-7</sup> | 47.9% (40.5-55.8%) | 70.0% (63.3-76.0%) | 0.59 (0.53-0.65) | Not significant         |
| FIT+ <i>Fn</i>   | All           | 0.445                  | 57.7% (49.7-65.0%) | 67.4% (60.7-74.0%) | 0.65 (0.59-0.70) | <i>p</i> <0.001         |

**Supporting Appendix.** The FITTER checklist for the reporting of studies using fecal immunochemical tests for hemoglobin

| Topic                                   | Item                                                                                                                                                                                                         | Priority                             | Documentation |
|-----------------------------------------|--------------------------------------------------------------------------------------------------------------------------------------------------------------------------------------------------------------|--------------------------------------|---------------|
| <b>Specimen collection and handling</b> |                                                                                                                                                                                                              |                                      |               |
|                                         | Name of specimen collection device and supplier (address).                                                                                                                                                   | Essential                            | Page 10       |
|                                         | Description of specimen collection device (vial with probe/stick, card, other).                                                                                                                              | Essential                            | Page 10       |
|                                         | Description of specimens used if an <i>in vivo</i> study (single or pooled feces, artificial matrix with added blood, etc).                                                                                  | Essential for laboratory evaluations | NA            |
|                                         | Details of fecal collection method (sampling technique and number of samples).                                                                                                                               | Essential                            | Page 10       |
|                                         | Who collected the specimens from the samples (patient, technician, etc).                                                                                                                                     | Essential                            | Page 7        |
|                                         | Number of fecal specimens used in the study (single, pooled, individual patient feces).                                                                                                                      | Essential for laboratory evaluations | Page 12       |
|                                         | Mean mass of feces collected.*                                                                                                                                                                               | Essential                            | NA            |
|                                         | Volume of buffer into which specimen is taken by probe, applicator stick or card.*                                                                                                                           | Essential                            | Page 10       |
|                                         | Time and storage conditions of fecal specimen from “passing” to sampling, including time and temperature (median and range).                                                                                 | Essential for laboratory evaluations | Page 7        |
|                                         | Time and storage of collection devices from specimen collection to analysis, including time and temperature (median and range). A concise description of process from collection to analysis is recommended. | Essential                            | Page 7        |
| <b>Analysis</b>                         |                                                                                                                                                                                                              |                                      |               |
|                                         | Name of analyser, model, supplier (address), number of systems if more than one used.                                                                                                                        | Essential                            | Page 10       |
|                                         | Number of times each sample was analysed.                                                                                                                                                                    | Essential                            | Page 10       |
|                                         | Analytical working range* and whether samples outside this range were diluted (factor) and reassayed.                                                                                                        | Essential for laboratory evaluations | NA            |
|                                         | Source of calibrator(s) (supplier with address), number of calibrator(s), how concentrations were assigned* and details of calibration process including frequency.                                          | Essential for laboratory evaluations | NA            |
|                                         | Analytical imprecision*, ideally with number of samples analysed, concentrations, and mean, SD and                                                                                                           | Essential for all studies            | NA            |

|                                                             |                                                                                                                                                                                                                                            |                                      |         |
|-------------------------------------------------------------|--------------------------------------------------------------------------------------------------------------------------------------------------------------------------------------------------------------------------------------------|--------------------------------------|---------|
|                                                             | CV.                                                                                                                                                                                                                                        |                                      |         |
| <b>Quality management</b>                                   |                                                                                                                                                                                                                                            |                                      |         |
|                                                             | Source (address) or description of internal quality control materials, number of controls, assigned target concentrations and ranges, how target concentrations were assigned, rules used for acceptance and rejection of analytical runs. | Desirable for laboratory evaluations | NA      |
|                                                             | Participation in external quality assessment schemes: (name and address of scheme), frequency of challenges, performance attained.                                                                                                         | Desirable for laboratory evaluations | NA      |
|                                                             | Accreditation held by the analytical facility (address).                                                                                                                                                                                   | Desirable for laboratory evaluations | NA      |
|                                                             | The number, training and expertise of the persons performing the analyses and recording the results.                                                                                                                                       | Essential                            | Page 10 |
| <b>Result handling</b>                                      |                                                                                                                                                                                                                                            |                                      |         |
|                                                             | Mode of collection of data – manual recording or via automatic download to IT system, single or double reading.                                                                                                                            | Desirable                            | NA      |
|                                                             | Units used, with conversion to µg Hb/g feces if ng Hb/mL used.                                                                                                                                                                             | Essential                            | Page 10 |
|                                                             | Cut-off concentration(s) if used and explanation of how assigned locally or by manufacturer.*                                                                                                                                              | Essential                            | Page 10 |
|                                                             | Were the analysts blinded (masked) to the results of the reference investigation and other clinical information?                                                                                                                           | Essential                            | Page 10 |
| <b>*information available from manufacturer or supplier</b> |                                                                                                                                                                                                                                            |                                      |         |

Note: NA=not applicable
